# Supplementary material for: Glycyrrhizic Acid Reduces Heart Rate and Blood Pressure by a Dual Mechanism
Source: MDPI journal article supplement (doi:10.3390/molecules21101291), 2016-09-27
Supplement: s1 [file s1]

## Supplementary Materials: Glycyrrhizic Acid Reduces Heart Rate and Blood Pressure by a Dual Mechanism

Kailash Singh, Aung Moe Zaw, Revathi Sekar, Ahuja Palak, Ahmed A Allam, Jamaan Ajarem and Billy K.C. Chow

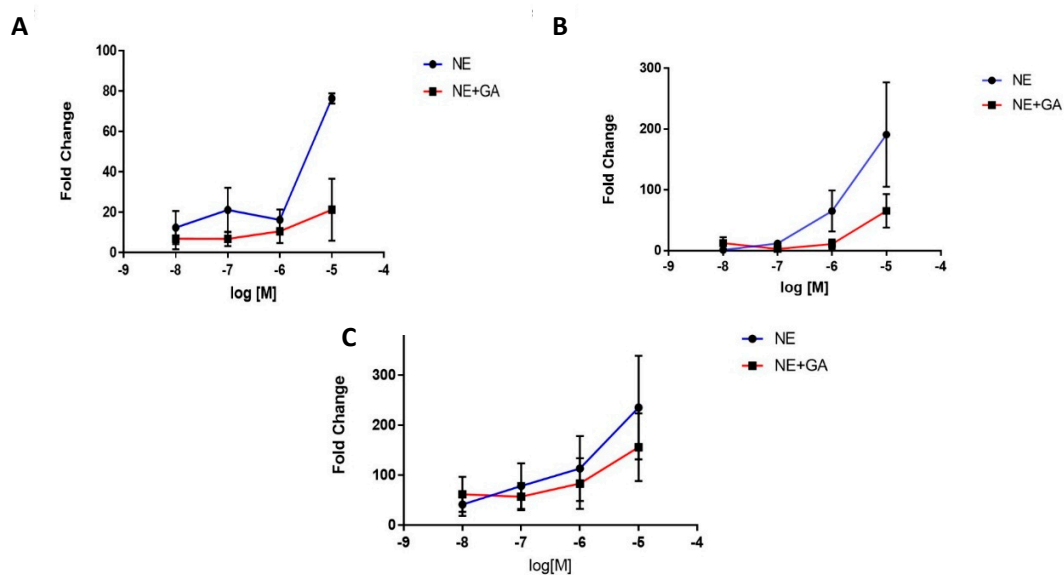

**Figure S1.** cAMP fold change difference at varying concentration of NE with (red line) and without (blue line) 10 μM GA on beta adrenergic receptors (A) beta1 adrenergic receptor; (B) beta2 adrenergic receptor; (C) beta3 adrenergic receptor.
